# Supplementary material for: Phenotypic Plasticity in Drosophila Pigmentation Caused by Temperature Sensitivity of a Chromatin Regulator Network
Source: PLOS journal article supplement (doi:10.1371/journal.pgen.0030030), 2007-02-14
Supplement: S1 (10.1371/journal.pgen.0030030.s001) [file journal.pgen.0030030.s001]

Table S1

|  | **20°C** | **25°C** | **29°C** |
| --- | --- | --- | --- |
| *babAR07/+* | 0.00 (± 0.00) N=21 | 0.18 (± 0.05) N=36 | 1.56 (± 0.25) N=15 |
| *babAR07/corto420* | 0.50 (± 0.09) N=22 | 1.54 (± 0.21) N=13 | 2.64 (± 0.18) N=14 |
| *babARO7/cortoL1* | 0.36 (± 0.11) N=14 | 1.42 (± 0.14) N=33 | 2.93 (± 0.15) N=15 |
| *babAR07/corto7128* | 0.14 (± 0.07) N=11 | 0.46 (± 0.13) N=12 | 2.30 (± 0.13) N=10 |
| *lolalk02512/+;babAR07/+* | 0.25 (± 0.10) N=16 | 1.11 (± 0.17) N=13 | 2.23 (± 0.17) N=15 |
| *babAR07/Trl13c* | 0.70 (± 0.11) N=10 | 1.71 (± 0.18) N=14 | 2.72 (± 0.09) N=9 |
| *babAR07/hsp83e6D* | 0.40 (± 0.12) N=10 | 0.67 (± 0.10) N=23 | 1.21 (± 0.13) N=19 |
